# Supplementary material for: Machine Learning-Powered Models for Near-Infrared Spectrometers: Prediction of Protein in Multiple Grain Cereals
Source: Preprints.org preprint supplement (doi:10.20944/preprints202202.0335.v1), 2022-02-25
Supplement: Supplementary file 3 [file Sensors-NIRS_Suppl S2_11022022.docx]

**Supplementary Table S2:** Descriptive statistics presenting the variability and range of protein content in the calibration and validation sets used in the study. [Legend: SD = standard deviation; CV% = coefficient of variation].

| **Details** | **Training set** | **Validation set** |
| --- | --- | --- |
| **Number of samples** | 262 | 66 |
| **Range of protein content (%, [g.100g-1])** | 5.99–21.51 | 6.76–20.14 |
| **Average (%, [g.100g-1])** | 13.67 | 13.27 |
| **SD** | 3.25 | 3.37 |
| **CV%** | 23.79 | 25.36 |
