# Supplementary material for: Machine Learning-Powered Models for Near-Infrared Spectrometers: Prediction of Protein in Multiple Grain Cereals
Source: Preprints.org preprint supplement (doi:10.20944/preprints202202.0335.v1), 2022-02-25
Supplement: Supplementary file 4 [file Sensors-NIRS_Suppl S3_11022022.docx]

**Supplementary Table S3:** Descriptive statistics [minimum (min), maximum (max), average (avg), standard deviation (SD), and standard error (SE)] of the protein content in each of the cereal species of the calibration and validation sets used in the study.

| **Set** | **n** | **Min** | **Max** | **Avg** | **SD** | **SE** |
| --- | --- | --- | --- | --- | --- | --- |
| **Calibration** | **262** | **5.99** | **21.51** | **13.67** | **3.25** | **0.20** |
| Finger millet | 16 | 5.99 | 9.59 | 7.95 | 0.94 | 0.24 |
| Foxtail millet | 16 | 9.08 | 13.42 | 11.49 | 1.16 | 0.29 |
| Maize | 7 | 8.76 | 9.97 | 9.23 | 0.44 | 0.17 |
| Pearl millet | 99 | 9.69 | 21.51 | 15.88 | 2.74 | 0.28 |
| Sorghum | 124 | 8.68 | 18.38 | 13.17 | 2.45 | 0.22 |
| **Validation** | **66** | **6.76** | **20.14** | **13.27** | **3.37** | **0.41** |
| Finger millet | 4 | 6.76 | 9.07 | 7.84 | 1.26 | 0.63 |
| Foxtail millet | 3 | 10.52 | 13.17 | 11.59 | 1.40 | 0.81 |
| Maize | 3 | 8.53 | 9.21 | 8.91 | 0.35 | 0.20 |
| Pearl millet | 26 | 9.76 | 20.14 | 15.38 | 3.23 | 0.63 |
| Sorghum | 30 | 8.79 | 17.40 | 12.77 | 2.35 | 0.43 |
| **Total** | **328** | **5.99** | **21.51** | **13.59** | **3.27** | **0.18** |
